# Supplementary material for: Coping with shorter days: do phenology shifts constrain aphid fitness?
Source: PeerJ. 2015 Jul 16;3:e1103. doi: 10.7717/peerj.1103 (PMC4511821; doi:10.7717/peerj.1103)
Supplement: Supplemental Information 1 — The first tab contains all raw data from the experiment on individuals.The second tab is a copy of raw data, but data is aligned by birth date. ‘dead’ is replaced with NA for better readability with analysis programs. Winged and injured organisms are excluded. The third tab contains data of the population experiment. [file peerj-03-1103-s001.xlsx]

## Sheet: raw data
nr	chamber	11.4.	12.4.	13.4.	14.4.	15.4.	16.4.	17.4.	18.4.	19.4.	20.4.	21.4.	22.4.	23.4.	24.4.	25.4.	26.4.	27.4.	28.4.	29.4.	1.5.	2.5.	3.5.	4.5.	5.5.	6.5.	7.5.	8.5.	9.5.	10.5.	11.5.	12.5.	13.5.	14.5.	15.5.	16.5.	17.5.	18.5.	19.5.	20.5.	21.5.	22.5.	23.5.	24.5.	25.5	26.5.	27.5.	28.5.	29.5.
1	1	6	0	0	0	0	0	0	0	0	0	0	4	7	5	4	4	3	3	4	5	3	1	3	5	3	0	2	5	3	0	1	1	1	0	0	0	0	0	0	0	0	0	0	0	0	dead	NA	NA
1	2	0	3	0	0	0	0	0	0	0	0	1	4	4	7	4	4	6	5	4	10	7	5	4	3	8	1	4	1	1	1	3	1	1	0	1	squeezed	NA	NA	NA	NA	NA	NA	NA	NA	NA	NA	NA	NA
1	3	4	0	0	0	0	0	0	0	0	0	0	3	4	6	4	3	2	1	0	5	4	1	0	0	0	0	0	0	0	0	0	0	0	0	0	0	0	1	0	dead	NA	NA	NA	NA	NA	NA	NA	NA
1	4	7	0	0	dead?	replaced	0	0	0	0	0	0	injured	dead	NA	NA	NA	NA	NA	NA	NA	NA	NA	NA	NA	NA	NA	NA	NA	NA	NA	NA	NA	NA	NA	NA	NA	NA	NA	NA	NA	NA	NA	NA	NA	NA	NA	NA	NA
2	1	6	0	0	0	0	0	0	0	0	0	0	3	5	9	3	3	5	1	2	8	5	0	4	3	2	3	0	0	0	0	0	dead	NA	NA	NA	NA	NA	NA	NA	NA	NA	NA	NA	NA	NA	NA	NA	NA
2	2	3	0	0	0	0	0	0	0	0	2	2	5	6	4	5	4	3	4	0	dead	NA	NA	NA	NA	NA	NA	NA	NA	NA	NA	NA	NA	NA	NA	NA	NA	NA	NA	NA	NA	NA	NA	NA	NA	NA	NA	NA	NA
2	3	4	0	0	0	0	0	0	0	0	0	0	0	4	4	7	2	1	0	1	8	10	6	3	3	3	2	0	1	5	2	2	1	0	1	0	0	0	0	0	0	0	0	0	0	0	0	dead	NA
2	4	0	0	4	0	0	0	0	0	0	0	0	2	4	2	5	1	0	0	3	13	1	4	0	2	1	0	3	2	0	0	0	1	0	0	0	0	0	dead	NA	NA	NA	NA	NA	NA	NA	NA	NA	NA
3	1	0	0	0	4	0	0	0	0	0	0	0	0	1	0	0	3	5	3	4	5	3	3	6	2	4	2	5	2	3	1	4	3	2	2	0	0	1	2	0	0	0	0	0	0	dead	NA	NA	NA
3	2	0	0	0	5	0	0	0	0	0	0	0	0	0	0	0	6	4	5	2	6	3	4	3	4	4	2	5	3	2	2	0,injured	NA	NA	NA	NA	NA	NA	NA	NA	NA	NA	NA	NA	NA	NA	NA	NA	NA
3	3	0	0	0	7	0	0	0	0	0	0	0	0	0	0	0	0	0	0	0	7	5	2	5	0	4	3	3	1	0	0	0	0	0	0	0	0	0	1	0	1	0	0	0	0	0	0	0	0
3	4	0	0	0	5	0	0	0	0	0	0	0	0	0	dead	NA	NA	NA	NA	NA	NA	NA	NA	NA	NA	NA	NA	NA	NA	NA	NA	NA	NA	NA	NA	NA	NA	NA	NA	NA	NA	NA	NA	NA	NA	NA	NA	NA	NA
4	1	4	0	0	0	0	0	0	0	0	3	1	3	8	3	3	3	4	6	3	10	8	3	3	2	8	3	1	4	1	3	2,dead	NA	NA	NA	NA	NA	NA	NA	NA	NA	NA	NA	NA	NA	NA	NA	NA	NA
4	2	0	4	0	0	0	0	0	0	0	0	3	5	3	8	4	10	4	5	6	5	8	1	3	4	1	1	0	4	2	1	0	1	0	0	0	0	dead	NA	NA	NA	NA	NA	NA	NA	NA	NA	NA	NA
4	3	0	0	4	0	0	0	0	0	0	0	0	0	0	0	1	6	5	4	4	8	6	1	0	1	1	0	0	1	0	0	0	0	2	0	0	1	0	1	0	dead	NA	NA	NA	NA	NA	NA	NA	NA
4	4	3	0	0	0	0	0	dead	NA	NA	NA	NA	NA	NA	NA	NA	NA	NA	NA	NA	NA	NA	NA	NA	NA	NA	NA	NA	NA	NA	NA	NA	NA	NA	NA	NA	NA	NA	NA	NA	NA	NA	NA	NA	NA	NA	NA	NA	NA
5	1	0	0	0	5	0	0	0	0	0	0	0	0	0	0	0	4	5	6	4	8	6	8	7	5	5	2	6	4	0	0	4	4	5	3	2	4	1	2	0	1	0	0	0	0	0	dead	NA	NA
5	2	3	0	0	0	0	0	0	0	0	2	1	5	2	0	0	0	0	0	0	dead	NA	NA	NA	NA	NA	NA	NA	NA	NA	NA	NA	NA	NA	NA	NA	NA	NA	NA	NA	NA	NA	NA	NA	NA	NA	NA	NA	NA
5	3	0	0	0	4	0	0	0	0	0	0	0	0	0	0	0	0	0	3	2	3	5	5	2	0	5	3	3	0	0	0	dead	NA	NA	NA	NA	NA	NA	NA	NA	NA	NA	NA	NA	NA	NA	NA	NA	NA
5	4	0	0	0	3	0	0	0	0	0	0	0	0	1	6	4	5	4	2	2	8	6	7	2	2	4	1	3	3	1	1	0	0	0	0	1	0	0	0	0	0	dead	NA	NA	NA	NA	NA	NA	NA
6	1	0	0	0	0	0	replaced	0	killed	NA	NA	NA	NA	NA	NA	NA	NA	NA	NA	NA	NA	NA	NA	NA	NA	NA	NA	NA	NA	NA	NA	NA	NA	NA	NA	NA	NA	NA	NA	NA	NA	NA	NA	NA	NA	NA	NA	NA	NA
6	2	0	0	0	0	4	0	0	0	0	0	0	0	0	0	3	4	5	3	2	7	3	3	4	4	3	0	0,dead	NA	NA	NA	NA	NA	NA	NA	NA	NA	NA	NA	NA	NA	NA	NA	NA	NA	NA	NA	NA	NA
6	3	0	0	0	0	0	5	0	0	0	0	0	0	0	0	0	0	3	7	5	8	0	5	5	6	8	3	5	4	1	0	4	2	2	0	0	0	0	0	0	0	0	0	0	0	0	0	0	dead
6	4	0	0	0	0	0	5	0	0	0	0	0	0	0	0	2	7	7	2	4	2	10	9	4	3	6	4	6	3	1	1	2	2	1	0	0	0	0	0	0	0	0	0	dead	NA	NA	NA	NA	NA
7	1	0	0	4	0	0	0	0	0	0	0	0	0	0	2	5	4	5	2	3	9	2	8	6	7	6	2	6	3	1	1	1	3	3	2	1	1	1	0	dead	NA	NA	NA	NA	NA	NA	NA	NA	NA
7	2	2	0	0	0	0	0	0	0	0	0	0	1	6	2	6	4	3	3	3	8	2	0	2	2	3	1	5	2	1	0	2	1	1	0	0	dead	NA	NA	NA	NA	NA	NA	NA	NA	NA	NA	NA	NA
7	3	0	0	0	5	0	0	0	0	0	0	0	0	0	0	0	4	3	3	7	14	2	0	0	0	0	0	0	1	0	0	1	1	1	0	1	0	0	0	0	0	dead	NA	NA	NA	NA	NA	NA	NA
7	4	9	0	0	0	0	0	0	0	0	6	4	8	6	3	0	2	3	10	6	8	3	3	1	0	1	2	0	0	0	0	dead	NA	NA	NA	NA	NA	NA	NA	NA	NA	NA	NA	NA	NA	NA	NA	NA	NA
8	1	4	0	0	0	0	0	0	0	0	0	1	5	4	8	3	10	5	3	7	5	4	5	5	4	6	6	1	4	1	1	0	1	1	1	1	0	0	0	0	0	0	0	0	0	dead	NA	NA	NA
8	2	0	0	0	0	replaced	0	0	0	0	0	0	0	1	1	4	2	dead	NA	NA	NA	NA	NA	NA	NA	NA	NA	NA	NA	NA	NA	NA	NA	NA	NA	NA	NA	NA	NA	NA	NA	NA	NA	NA	NA	NA	NA	NA	NA
8	3	3	0	0	0	0	0	0	0	0	0	0	4	3	6	2	5	2	3	5	7	8	9	4	4	2	0	3	1	3	0	0	2	3	0	0	0	1	0	0	0	0	0	0	0	dead	NA	NA	NA
8	4	6	0	0	0	0	0	0	0	0	4	5	6	6	3	4	5	4	2	3	7	4	5	4	4	1	0	1	0	0	0	0	0	0	0	0	0	0	0	0	dead	NA	NA	NA	NA	NA	NA	NA	NA
9	1	0	0	0	6	0	0	0	0	0	0	0	0	3	2	5	6	2	3	7	7	6	4	3	4	4	3	1	5	1	2	1	1	1	0	0	dead	NA	NA	NA	NA	NA	NA	NA	NA	NA	NA	NA	NA
9	2	0	0	4	0	0	0	0	0	0	0	0	0	0	0	2	7	5	1	7	6	5	6	4	4	4	3	2	3	4	1	4	3	3	3	0	5	1	0	1	0	0	0	dead	NA	NA	NA	NA	NA
9	3	8	0	d		replaced	0	missing	NA	NA	NA	NA	NA	NA	NA	NA	NA	NA	NA	NA	NA	NA	NA	NA	NA	NA	NA	NA	NA	NA	NA	NA	NA	NA	NA	NA	NA	NA	NA	NA	NA	NA	NA	NA	NA	NA	NA	NA	NA
9	4	0	3	0	0	0	0	0	0	0	0	0	7	9	3	0	5	1	dead	NA	NA	NA	NA	NA	NA	NA	NA	NA	NA	NA	NA	NA	NA	NA	NA	NA	NA	NA	NA	NA	NA	NA	NA	NA	NA	NA	NA	NA	NA
10	1	3	0	0	0	0	0	0	0	0	0	0	1	6	1	2	6	1	4	4	7	3	4	6	5	3	3	2	6	1	0	2	3	1	0	0	0	0	0	0	0	0	0	0	0	dead	NA	NA	NA
10	2	0	3	0	0	0	0	0	0	0	0	0	5	3	8	0	11	6	7	3	4	4	3	4	2	5	3	2	1	1	0	0	1	1	0	0	0	0	0	0	0	0	0	dead	NA	NA	NA	NA	NA
10	3	2	0	0	0	0	0	0	0	0	0	0	3	3	3	5	2	1	4	3	13	7	11	4	3	5	1	4	3	0	0	2	3	0	0	0	0	0	0	dead	NA	NA	NA	NA	NA	NA	NA	NA	NA
10	4	5	0	0	0	0	0	0	0	1	6	9	8	3	4	4	5	6	5	6	5	4	2	1	1	0	0	0	0	0	0	0	0	0	dead	NA	NA	NA	NA	NA	NA	NA	NA	NA	NA	NA	NA	NA	NA
11	1	0	0	4	0	0	0	0	0	0	0	0	0	0	0	0	1	3	3	1	0, dead	NA	NA	NA	NA	NA	NA	NA	NA	NA	NA	NA	NA	NA	NA	NA	NA	NA	NA	NA	NA	NA	NA	NA	NA	NA	NA	NA	NA
11	2	0	0	0	4	0	0	0	0	0	0	0	0	0	0	4	9	3	1	6	5	4	4	4	4	2	6	5	4	2	0	6	9	4	2	0	1	0	1	1	2	0	0	1	0	dead	NA	NA	NA
11	3	0	0	0	0	1	0	0	0	0	0	0	0	0	0	0	0	1	5	4	5	4	2	6	6	6	7	2	2	2	1	3	1	0	0	0	0	0	0	0	0	0	0	0	0	dead	NA	NA	NA
11	4	0	1	0	0	0	0	0	0	0	0	0	0	0	0	5	3	0	0	1	13	0,missing	NA	NA	NA	NA	NA	NA	NA	NA	NA	NA	NA	NA	NA	NA	NA	NA	NA	NA	NA	NA	NA	NA	NA	NA	NA	NA	NA
12	1	0	0	0	0	0	0	5	0	0	0	0	0	0	0	0	0	0	0	4	7	5	7	7	5	6	1	8	5	2	2	5	5	4	5	0	2	0	1	4	0	0	0	1	0	0	0	0	0
12	2	2	0	0	0	0	0	0	0	0	0	0	3	0	6	5	2	4	4	3	4	1	6	4	3	0	2	2	6	1	0	2	3	0	0	1	0	0	0	dead	NA	NA	NA	NA	NA	NA	NA	NA	NA
12	3	3	0	0	0	0	0	0	0	0	0	0	3	4	2	2	NA	NA	NA	NA	NA	NA	NA	NA	NA	NA	NA	NA	NA	NA	NA	NA	NA	NA	NA	NA	NA	NA	NA	NA	NA	NA	NA	NA	NA	NA	NA	NA	NA
12	4	0	2	0	0	0	0	0	0	0	0	0	1	6	6	3	1	1	8	6	11	4	1	1	2	0	0	0	1	1	1	0	0	0	0	dead	NA	NA	NA	NA	NA	NA	NA	NA	NA	NA	NA	NA	NA
13	1	0	0	2	0	0	0	0	0	0	0	0	0	0	3	0	5	5	3	6	9	5	9	7	5	3	6	4	5	1	0	2	4	1	0	0	0	0	0	0	0	dead	NA	NA	NA	NA	NA	NA	NA
13	2	2	0	0	0	0	0	0	0	0	1	4	7	7	5	7	7	6	8	5	6	8	2	2	1	4	6	2	0	0	0	0	1	0	0	0	0	dead	NA	NA	NA	NA	NA	NA	NA	NA	NA	NA	NA
13	3	5	0	0	0	0	0	0	0	0	0	0	0	4	3	3	3	0	0	1	12	11	1	3	2	2	2	1	0	0	0	0	0	0	0	1	0	0	0	0	0	0	0	0	0	dead	NA	NA	NA
13	4	0	0	4	0	0	0	0	0	0	0	0	0	4	1	1	1	2	3	9	5	3	1	3	4	0	5	0	6	0	2	0	2	0	0	0	dead	NA	NA	NA	NA	NA	NA	NA	NA	NA	NA	NA	NA
14	1	0	0	0	3	0	0	0	0	0	0	0	0	0	0	0	1	3	3	3	9	6	7, Killed	NA	NA	NA	NA	NA	NA	NA	NA	NA	NA	NA	NA	NA	NA	NA	NA	NA	NA	NA	NA	NA	NA	NA	NA	NA	NA
14	2	1	0	0	0	0	0	0	0	0	0	0	0	2	0	0	0	0	2	0	4	0	0	0	0	0	0	0	1	0	0	0	0	2	2	0	0	0	0	1	0	1	0	0	0	0	dead	NA	NA
14	3	0	0	0	0	4	0	0	0	0	0	0	0		0	0	0	0	0	3	4	6	3	2	2	2	5	0	3	0	0	0	0	1	0	0	0	0	0	0	0	0	0	0	0	0	dead	NA	NA
14	4	0	0	0	4	0	0	0	0	0	0	0	0	0	5	5	8	5	3	4	7	9	4	3	2	1	2	4	2	0	1	4	2	3	0	0	0	0	0	0	dead	NA	NA	NA	NA	NA	NA	NA	NA
15	1	0	0	0	0	0	replaced	0	0	0	0	0	0	0	0	0	3	2	5	2	7	5	3	3	3	7	7	7	5	2	1	3	4	1	3	4	0	2	1	0	0	0	0	0	0	0	dead	NA	NA
15	2	3	0	0	0	0	0	0	0	0	0	0	6	8	3	4	3	7	4	3	6	2	2	2	3	0	1	3	0	1	1	0	0	1	0	0	0	0	1	dead	NA	NA	NA	NA	NA	NA	NA	NA	NA
15	3	0	0	0	7	0	0	0	0	0	0	0	0	0	0	0	0	0	0	4	2	2	0	3	3	2	0	1	2	0	0	0	0	1	0	0	0	0	0	0	0	0	0	0	0	dead	NA	NA	NA
15	4	0	0	5	0	0	0	0	0	0	0	0	0	0	4	3	1	1	0	1	2	13	0	3	2	0	0	0	0,dead	NA	NA	NA	NA	NA	NA	NA	NA	NA	NA	NA	NA	NA	NA	NA	NA	NA	NA	NA	NA
16	1	0	0	0	0	2	0	0	0	0	0	0	0	dead	NA	NA	NA	NA	NA	NA	NA	NA	NA	NA	NA	NA	NA	NA	NA	NA	NA	NA	NA	NA	NA	NA	NA	NA	NA	NA	NA	NA	NA	NA	NA	NA	NA	NA	NA
16	2	0	0	0	4	0	0	0	0	0	0	0	0	0	3	5	7	5	7	3	8	5	4	4	3	3	2	1	4	0	0	4	2	1	0	0	0	0	0	0	0	dead	NA	NA	NA	NA	NA	NA	NA
16	3	0	0	0	2	0	0	0	0	0	0	0	0	0	6	0	0	2	5	2	11	8	4	0	0	0	0	0	1	0	0	0	0	0	0	dead	NA	NA	NA	NA	NA	NA	NA	NA	NA	NA	NA	NA	NA
16	4	8	0	0	0	0	0	0	0	0	3	0	5	2	3	0	0	6	5	8	9	2	3	2	2	3	2	2	1	0	1	0	0	0	0	0	0	0	0	0	dead	NA	NA	NA	NA	NA	NA	NA	NA
17	1	0	0	0	0	1	0	missing	NA	NA	NA	NA	NA	NA	NA	NA	NA	NA	NA	NA	NA	NA	NA	NA	NA	NA	NA	NA	NA	NA	NA	NA	NA	NA	NA	NA	NA	NA	NA	NA	NA	NA	NA	NA	NA	NA	NA	NA	NA
17	2	0	0	0	4	0	0	0	0	0	0	0	0	0	2	4	6	4	5	6	12	8	3	6	5	2	2	7	2	0	0	4	1	2	0	1	0	0	0	0	0	0	0	0	dead	NA	NA	NA	NA
17	3	0	0	0	0	4	0	0	0	0	0	0	0	0	0	0	0	4	5	3	5	2	3	7	8	2	9	8	4	3	1	3	4	0	1	1	0	0	0	0	0	0	0	0	0	0	0	0	0
17	4	0	0	0	0	4	0	0	0	0	0	0	0	0	1	5	5	1		1	5	12	0	4	3	1	0	0	0	0	0	0	1	1	0	0	0	0	dead	NA	NA	NA	NA	NA	NA	NA	NA	NA	NA
18	1	0	0	0	0	5	0	0	0	0	0	0	0	0	0	0	0	2	4	6	6	6	4	5	4	1	5	2	8	5	1	5	6	4	0	3	0	1	1	0	0	0	0	0	0	0	0	0	0
18	2	0	0	1	0	0	0	0	dead	NA	NA	NA	NA	NA	NA	NA	NA	NA	NA	NA	NA	NA	NA	NA	NA	NA	NA	NA	NA	NA	NA	NA	NA	NA	NA	NA	NA	NA	NA	NA	NA	NA	NA	NA	NA	NA	NA	NA	NA
18	3	7	0	0	0	0	0	0	0	0	0	0	0	6	4	4	2	0	0	2	13	3	4	2	3	0	2	1	0	2	0	0	0	0	0	0	0	0	0	0	0	0	0	dead	NA	NA	NA	NA	NA
18	4	0	0	0	5	0	0	dead	NA	NA	NA	NA	NA	NA	NA	NA	NA	NA	NA	NA	NA	NA	NA	NA	NA	NA	NA	NA	NA	NA	NA	NA	NA	NA	NA	NA	NA	NA	NA	NA	NA	NA	NA	NA	NA	NA	NA	NA	NA
19	1	0	0	3	0	0	0	0	0	0	0	0	0	0	0	2	4	4	1	2	2, missing	NA	NA	NA	NA	NA	NA	NA	NA	NA	NA	NA	NA	NA	NA	NA	NA	NA	NA	NA	NA	NA	NA	NA	NA	NA	NA	NA	NA
19	2	0	0	0	0	3	0	0	0	0	0	0	0	0	0	4	6	3	2	5	7	4	4	3	3	3	2	0	0	3	0	4	3	2	0	0	0	0	0	0	2	0	0	0	0	0	dead	NA	NA
19	3	0	0	0	0	0	4	0	0	0	0	0	0	0	0	0	0	0	0	3	9	2	5	7	5	0	1	2	0	0	0	0	0	0	0	0	0	0	0	0	0	dead	NA	NA	NA	NA	NA	NA	NA
19	4	0	0	0	3	0	0	0	0	0	0	0	0	0	0	0	0	0	0	5	9	5	1	0	4	3	0	0	0	2	0	1	1	0	0	0	0	0	1	0	0	0	0	0	0	0	0	dead	NA
20	1	0	0	0	6	0	0	0	0	0	0	0	0	0	0	0	0	0	5	3	9	4	2	6	6	7	6	5	2	2	2	2	4	5	0	1	0	2	1	0	0	0	0	dead	NA	NA	NA	NA	NA
20	2	0	0	0	0	0	6	0	0	0	0	0	0	0	0	0	5	5	6	3	8	7	8	2	0	5	5	4	5	3	1	2	3	3	0	3	0	0	0	0	1	0	0	0	dead	NA	NA	NA	NA
20	3	0	0	0	5	0	0	0	0	0	0	0	0	0	0	0	0	0	0	7	0	9	0	3	3	0	1	2	3	2	2	4	3	0	1	0	0	0	0	0	0	0	0	0	dead	NA	NA	NA	NA
20	4	0	0	1	0	0	0	0	0	0	0	0	0	0	1	3	4	4	4	1	6	3	1	6	4	1	0	0	1	0	0	0	0	0	0	dead	NA	NA	NA	NA	NA	NA	NA	NA	NA	NA	NA	NA	NA
		1	2	3	4	5	6	7	8	9	10	11	12	13	14	15	16	17	18	19	20	21	22	23	24	25	26	27	28	29	30	31	32	33	34	35	36	37	38	39	40	41	42	43
[truncated: 8 more columns]

## Sheet: for analysis
nr	chamber	pos	1	2	3	4	5	6	7	8	9	10	11	12	13	14	15	16	17	18	19	20	21	22	23	24	25	26	27	28	29	30	31	32	33	34	35	36	37	38	39	40	41	42	43	44	45	46	47
1	1	upper	0	0	0	0	0	0	0	0	0	0	0	4	7	5	4	4	3	3	4	5	3	1	3	5	3	0	2	5	3	0	1	1	1	0	0	0	0	0	0	0	0	0	0	0	0	NA	NA
1	2	upper	0	0	0	0	0	0	0	0	0	1	4	4	7	4	4	6	5	4	10	7	5	4	3	8	1	4	1	1	1	3	1	1	0	1	NA	NA	NA	NA	NA	NA	NA	NA	NA	NA	NA	NA	NA
1	3	upper	0	0	0	0	0	0	0	0	0	0	0	3	4	6	4	3	2	1	0	5	4	1	0	0	0	0	0	0	0	0	0	0	0	0	0	0	0	1	0	NA	NA	NA	NA	NA	NA	NA	NA
2	1	upper	0	0	0	0	0	0	0	0	0	0	0	3	5	9	3	3	5	1	2	8	5	0	4	3	2	3	0	0	0	0	0	NA	NA	NA	NA	NA	NA	NA	NA	NA	NA	NA	NA	NA	NA	NA	NA
2	2	upper	0	0	0	0	0	0	0	0	0	2	2	5	6	4	5	4	3	4	0	NA	NA	NA	NA	NA	NA	NA	NA	NA	NA	NA	NA	NA	NA	NA	NA	NA	NA	NA	NA	NA	NA	NA	NA	NA	NA	NA	NA
2	3	upper	0	0	0	0	0	0	0	0	0	0	0	0	4	4	7	2	1	0	1	8	10	6	3	3	3	2	0	1	5	2	2	1	0	1	0	0	0	0	0	0	0	0	0	0	0	0	NA
2	4	upper	0	0	0	0	0	0	0	0	0	2	4	2	5	1	0	0	3	13	1	4	0	2	1	0	3	2	0	0	0	1	0	0	0	0	0	NA	NA	NA	NA	NA	NA	NA	NA	NA	NA	NA	NA
3	1	upper	0	0	0	0	0	0	0	0	0	1	0	0	3	5	3	4	5	3	3	6	2	4	2	5	2	3	1	4	3	2	2	0	0	1	2	0	0	0	0	0	0	NA	NA	NA	NA	NA	NA
3	2	upper	0	0	0	0	0	0	0	0	0	0	0	0	6	4	5	2	6	3	4	3	4	4	2	5	3	2	2	NA	NA	NA	NA	NA	NA	NA	NA	NA	NA	NA	NA	NA	NA	NA	NA	NA	NA	NA	NA
3	3	upper	0	0	0	0	0	0	0	0	0	0	0	0	0	0	0	0	7	5	2	5	0	4	3	3	1	0	0	0	0	0	0	0	0	0	1	0	1	0	0	0	0	0	0	0	0	0	0
4	1	upper	0	0	0	0	0	0	0	0	0	3	1	3	8	3	3	3	4	6	3	10	8	3	3	2	8	3	1	4	1	3	NA	NA	NA	NA	NA	NA	NA	NA	NA	NA	NA	NA	NA	NA	NA	NA	NA
4	2	upper	0	0	0	0	0	0	0	0	0	3	5	3	8	4	10	4	5	6	5	8	1	3	4	1	1	0	4	2	1	0	1	0	0	0	0	NA	NA	NA	NA	NA	NA	NA	NA	NA	NA	NA	NA
4	3	upper	0	0	0	0	0	0	0	0	0	0	0	0	1	6	5	4	4	8	6	1	0	1	1	0	0	1	0	0	0	0	2	0	0	1	0	1	0	NA	NA	NA	NA	NA	NA	NA	NA	NA	NA
5	1	upper	0	0	0	0	0	0	0	0	0	0	0	0	4	5	6	4	8	6	8	7	5	5	2	6	4	0	0	4	4	5	3	2	4	1	2	0	1	0	0	0	0	0	NA	NA	NA	NA	NA
5	2	upper	0	0	0	0	0	0	0	0	0	2	1	5	2	0	0	0	0	0	0	NA	NA	NA	NA	NA	NA	NA	NA	NA	NA	NA	NA	NA	NA	NA	NA	NA	NA	NA	NA	NA	NA	NA	NA	NA	NA	NA	NA
5	3	upper	0	0	0	0	0	0	0	0	0	0	0	0	0	0	3	2	3	5	5	2	0	5	3	3	0	0	0	NA	NA	NA	NA	NA	NA	NA	NA	NA	NA	NA	NA	NA	NA	NA	NA	NA	NA	NA	NA
5	4	upper	0	0	0	0	0	0	0	0	0	1	6	4	5	4	2	2	8	6	7	2	2	4	1	3	3	1	1	0	0	0	0	1	0	0	0	0	0	NA	NA	NA	NA	NA	NA	NA	NA	NA	NA
6	2	upper	0	0	0	0	0	0	0	0	0	0	3	4	5	3	2	7	3	3	4	4	3	0	NA	NA	NA	NA	NA	NA	NA	NA	NA	NA	NA	NA	NA	NA	NA	NA	NA	NA	NA	NA	NA	NA	NA	NA	NA
6	3	upper	0	0	0	0	0	0	0	0	0	0	0	3	7	5	8	0	5	5	6	8	3	5	4	1	0	4	2	2	0	0	0	0	0	0	0	0	0	0	0	0	0	0	NA	NA	NA	NA	NA
6	4	upper	0	0	0	0	0	0	0	0	0	2	7	7	2	4	2	10	9	4	3	6	4	6	3	1	1	2	2	1	0	0	0	0	0	0	0	0	0	NA	NA	NA	NA	NA	NA	NA	NA	NA	NA
7	1	upper	0	0	0	0	0	0	0	0	0	0	0	2	5	4	5	2	3	9	2	8	6	7	6	2	6	3	1	1	1	3	3	2	1	1	1	0	NA	NA	NA	NA	NA	NA	NA	NA	NA	NA	NA
7	2	upper	0	0	0	0	0	0	0	0	0	0	0	1	6	2	6	4	3	3	3	8	2	0	2	2	3	1	5	2	1	0	2	1	1	0	0	NA	NA	NA	NA	NA	NA	NA	NA	NA	NA	NA	NA
7	3	upper	0	0	0	0	0	0	0	0	0	0	0	0	4	3	3	7	14	2	0	0	0	0	0	0	1	0	0	1	1	1	0	1	0	0	0	0	0	NA	NA	NA	NA	NA	NA	NA	NA	NA	NA
7	4	upper	0	0	0	0	0	0	0	0	0	6	4	8	6	3	0	2	3	10	6	8	3	3	1	0	1	2	0	0	0	0	NA	NA	NA	NA	NA	NA	NA	NA	NA	NA	NA	NA	NA	NA	NA	NA	NA
8	1	upper	0	0	0	0	0	0	0	0	0	0	1	5	4	8	3	10	5	3	7	5	4	5	5	4	6	6	1	4	1	1	0	1	1	1	1	0	0	0	0	0	0	0	0	0	NA	NA	NA
8	2	upper	0	0	0	0	0	0	0	0	0	1	1	4	2	NA	NA	NA	NA	NA	NA	NA	NA	NA	NA	NA	NA	NA	NA	NA	NA	NA	NA	NA	NA	NA	NA	NA	NA	NA	NA	NA	NA	NA	NA	NA	NA	NA	NA
8	3	upper	0	0	0	0	0	0	0	0	0	0	0	4	3	6	2	5	2	3	5	7	8	9	4	4	2	0	3	1	3	0	0	2	3	0	0	0	1	0	0	0	0	0	0	0	NA	NA	NA
8	4	upper	0	0	0	0	0	0	0	0	0	4	5	6	6	3	4	5	4	2	3	7	4	5	4	4	1	0	1	0	0	0	0	0	0	0	0	0	0	0	0	NA	NA	NA	NA	NA	NA	NA	NA
9	1	upper	0	0	0	0	0	0	0	0	0	3	2	5	6	2	3	7	7	6	4	3	4	4	3	1	5	1	2	1	1	1	0	0	NA	NA	NA	NA	NA	NA	NA	NA	NA	NA	NA	NA	NA	NA	NA
9	2	upper	0	0	0	0	0	0	0	0	0	0	0	0	2	7	5	1	7	6	5	6	4	4	4	3	2	3	4	1	4	3	3	3	0	5	1	0	1	0	0	0	NA	NA	NA	NA	NA	NA	NA
9	4	upper	0	0	0	0	0	0	0	0	0	0	7	9	3	0	5	1	NA	NA	NA	NA	NA	NA	NA	NA	NA	NA	NA	NA	NA	NA	NA	NA	NA	NA	NA	NA	NA	NA	NA	NA	NA	NA	NA	NA	NA	NA	NA
10	1	upper	0	0	0	0	0	0	0	0	0	0	0	1	6	1	2	6	1	4	4	7	3	4	6	5	3	3	2	6	1	0	2	3	1	0	0	0	0	0	0	0	0	0	0	0	NA	NA	NA
10	2	upper	0	0	0	0	0	0	0	0	0	0	5	3	8	0	11	6	7	3	4	4	3	4	2	5	3	2	1	1	0	0	1	1	0	0	0	0	0	0	0	0	0	NA	NA	NA	NA	NA	NA
10	3	upper	0	0	0	0	0	0	0	0	0	0	0	3	3	3	5	2	1	4	3	13	7	11	4	3	5	1	4	3	0	0	2	3	0	0	0	0	0	0	NA	NA	NA	NA	NA	NA	NA	NA	NA
10	4	upper	0	0	0	0	0	0	0	0	1	6	9	8	3	4	4	5	6	5	6	5	4	2	1	1	0	0	0	0	0	0	0	0	0	NA	NA	NA	NA	NA	NA	NA	NA	NA	NA	NA	NA	NA	NA
11	1	lower	0	0	0	0	0	0	0	0	0	0	0	0	0	1	3	3	1	NA	NA	NA	NA	NA	NA	NA	NA	NA	NA	NA	NA	NA	NA	NA	NA	NA	NA	NA	NA	NA	NA	NA	NA	NA	NA	NA	NA	NA	NA
11	2	lower	0	0	0	0	0	0	0	0	0	0	0	4	9	3	1	6	5	4	4	4	4	2	6	5	4	2	0	6	9	4	2	0	1	0	1	1	2	0	0	1	0	NA	NA	NA	NA	NA	NA
11	3	lower	0	0	0	0	0	0	0	0	0	0	0	0	1	5	4	5	4	2	6	6	6	7	2	2	2	1	3	1	0	0	0	0	0	0	0	0	0	0	0	0	NA	NA	NA	NA	NA	NA	NA
11	4	lower	0	0	0	0	0	0	0	0	0	0	0	0	0	5	3	0	0	1	13	NA	NA	NA	NA	NA	NA	NA	NA	NA	NA	NA	NA	NA	NA	NA	NA	NA	NA	NA	NA	NA	NA	NA	NA	NA	NA	NA	NA
12	1	lower	0	0	0	0	0	0	0	0	0	0	0	0	4	7	5	7	7	5	6	1	8	5	2	2	5	5	4	5	0	2	0	1	4	0	0	0	1	0	0	0	0	0	NA	NA	NA	NA	NA
12	2	lower	0	0	0	0	0	0	0	0	0	0	0	3	0	6	5	2	4	4	3	4	1	6	4	3	0	2	2	6	1	0	2	3	0	0	1	0	0	0	NA	NA	NA	NA	NA	NA	NA	NA	NA
12	3	lower	0	0	0	0	0	0	0	0	0	0	0	3	4	2	2	NA	NA	NA	NA	NA	NA	NA	NA	NA	NA	NA	NA	NA	NA	NA	NA	NA	NA	NA	NA	NA	NA	NA	NA	NA	NA	NA	NA	NA	NA	NA	NA
12	4	lower	0	0	0	0	0	0	0	0	0	0	1	6	6	3	1	1	8	6	11	4	1	1	2	0	0	0	1	1	1	0	0	0	0	NA	NA	NA	NA	NA	NA	NA	NA	NA	NA	NA	NA	NA	NA
13	1	lower	0	0	0	0	0	0	0	0	0	0	0	3	0	5	5	3	6	9	5	9	7	5	3	6	4	5	1	0	2	4	1	0	0	0	0	0	0	0	NA	NA	NA	NA	NA	NA	NA	NA	NA
13	2	lower	0	0	0	0	0	0	0	0	0	1	4	7	7	5	7	7	6	8	5	6	8	2	2	1	4	6	2	0	0	0	0	1	0	0	0	0	NA	NA	NA	NA	NA	NA	NA	NA	NA	NA	NA
13	3	lower	0	0	0	0	0	0	0	0	0	0	0	0	4	3	3	3	0	0	1	12	11	1	3	2	2	2	1	0	0	0	0	0	0	0	1	0	0	0	0	0	0	0	0	0	NA	NA	NA
13	4	lower	0	0	0	0	0	0	0	0	0	0	4	1	1	1	2	3	9	5	3	1	3	4	0	5	0	6	0	2	0	2	0	0	0	NA	NA	NA	NA	NA	NA	NA	NA	NA	NA	NA	NA	NA	NA
14	1	lower	0	0	0	0	0	0	0	0	0	0	0	0	1	3	3	3	9	6	NA	NA	NA	NA	NA	NA	NA	NA	NA	NA	NA	NA	NA	NA	NA	NA	NA	NA	NA	NA	NA	NA	NA	NA	NA	NA	NA	NA	NA
14	2	lower	0	0	0	0	0	0	0	0	0	0	0	0	2	0	0	0	0	2	0	4	0	0	0	0	0	0	0	1	0	0	0	0	2	2	0	0	0	0	1	0	1	0	0	0	0	NA	NA
14	3	lower	0	0	0	0	0	0	0	0	0	0	0	0	0	0	3	4	6	3	2	2	2	5	0	3	0	0	0	0	1	0	0	0	0	0	0	0	0	0	0	0	0	NA	NA	NA	NA	NA	NA
14	4	lower	0	0	0	0	0	0	0	0	0	0	5	5	8	5	3	4	7	9	4	3	2	1	2	4	2	0	1	4	2	3	0	0	0	0	0	0	NA	NA	NA	NA	NA	NA	NA	NA	NA	NA	NA
15	1	lower	0	0	0	0	0	0	0	0	0	0	0	3	2	5	2	7	5	3	3	3	7	7	7	5	2	1	3	4	1	3	4	0	2	1	0	0	0	0	0	0	0	NA	NA	NA	NA	NA	NA
15	2	lower	0	0	0	0	0	0	0	0	0	0	0	6	8	3	4	3	7	4	3	6	2	2	2	3	0	1	3	0	1	1	0	0	1	0	0	0	0	1	NA	NA	NA	NA	NA	NA	NA	NA	NA
15	3	lower	0	0	0	0	0	0	0	0	0	0	0	0	0	0	0	4	2	2	0	3	3	2	0	1	2	0	0	0	0	1	0	0	0	0	0	0	0	0	0	0	0	NA	NA	NA	NA	NA	NA
15	4	lower	0	0	0	0	0	0	0	0	0	0	0	4	3	1	1	0	1	2	13	0	3	2	0	0	0	NA	NA	NA	NA	NA	NA	NA	NA	NA	NA	NA	NA	NA	NA	NA	NA	NA	NA	NA	NA	NA	NA
16	2	lower	0	0	0	0	0	0	0	0	0	0	3	5	7	5	7	3	8	5	4	4	3	3	2	1	4	0	0	4	2	1	0	0	0	0	0	0	0	NA	NA	NA	NA	NA	NA	NA	NA	NA	NA
16	3	lower	0	0	0	0	0	0	0	0	0	0	6	0	0	2	5	2	11	8	4	0	0	0	0	0	1	0	0	0	0	0	0	NA	NA	NA	NA	NA	NA	NA	NA	NA	NA	NA	NA	NA	NA	NA	NA
16	4	lower	0	0	0	0	0	0	0	0	0	3	0	5	2	3	0	0	6	5	8	9	2	3	2	2	3	2	2	1	0	1	0	0	0	0	0	0	0	0	0	NA	NA	NA	NA	NA	NA	NA	NA
17	2	lower	0	0	0	0	0	0	0	0	0	0	2	4	6	4	5	6	12	8	3	6	5	2	2	7	2	0	0	4	1	2	0	1	0	0	0	0	0	0	0	0	NA	NA	NA	NA	NA	NA	NA
17	3	lower	0	0	0	0	0	0	0	0	0	0	0	0	4	5	3	5	2	3	7	8	2	9	8	4	3	1	3	4	0	1	1	0	0	0	0	0	0	0	0	0	0	0	0	0	0	0	NA
17	4	lower	0	0	0	0	0	0	0	0	0	1	5	5	1	0	1	5	12	0	4	3	1	0	0	0	0	0	0	1	1	0	0	0	0	NA	NA	NA	NA	NA	NA	NA	NA	NA	NA	NA	NA	NA	NA
18	1	lower	0	0	0	0	0	0	0	0	0	0	0	0	2	4	6	6	6	4	5	4	1	5	2	8	5	1	5	6	4	0	3	0	1	1	0	0	0	0	0	0	0	0	0	0	0	NA	NA
18	3	lower	0	0	0	0	0	0	0	0	0	0	0	0	6	4	4	2	0	0	2	13	3	4	2	3	0	2	1	0	2	0	0	0	0	0	0	0	0	0	0	0	0	0	NA	NA	NA	NA	NA
19	1	lower	0	0	0	0	0	0	0	0	0	0	0	0	2	4	4	1	2	NA	NA	NA	NA	NA	NA	NA	NA	NA	NA	NA	NA	NA	NA	NA	NA	NA	NA	NA	NA	NA	NA	NA	NA	NA	NA	NA	NA	NA	NA
19	2	lower	0	0	0	0	0	0	0	0	0	0	4	6	3	2	5	7	4	4	3	3	3	2	0	0	3	0	4	3	2	0	0	0	0	0	0	2	0	0	0	0	0	NA	NA	NA	NA	NA	NA
19	3	lower	0	0	0	0	0	0	0	0	0	0	0	0	0	3	9	2	5	7	5	0	1	2	0	0	0	0	0	0	0	0	0	0	0	0	0	NA	NA	NA	NA	NA	NA	NA	NA	NA	NA	NA	NA
19	4	lower	0	0	0	0	0	0	0	0	0	0	0	0	0	0	0	5	9	5	1	0	4	3	0	0	0	2	0	1	1	0	0	0	0	0	1	0	0	0	0	0	0	0	0	NA	NA	NA	NA
20	1	lower	0	0	0	0	0	0	0	0	0	0	0	0	0	0	5	3	9	4	2	6	6	7	6	5	2	2	2	2	4	5	0	1	0	2	1	0	0	0	0	NA	NA	NA	NA	NA	NA	NA	NA
20	2	lower	0	0	0	0	0	0	0	0	0	0	5	5	6	3	8	7	8	2	0	5	5	4	5	3	1	2	3	3	0	3	0	0	0	0	1	0	0	0	NA	NA	NA	NA	NA	NA	NA	NA	NA
20	3	lower	0	0	0	0	0	0	0	0	0	0	0	0	0	0	0	7	0	9	0	3	3	0	1	2	3	2	2	4	3	0	1	0	0	0	0	0	0	0	0	0	NA	NA	NA	NA	NA	NA	NA
20	4	lower	0	0	0	0	0	0	0	0	0	0	0	1	3	4	4	4	1	6	3	1	6	4	1	0	0	1	0	0	0	0	0	0	NA	NA	NA	NA	NA	NA	NA	NA	NA	NA	NA	NA	NA	NA	NA
[truncated: 8 more columns]

## Sheet: pop
	A.pisum Population experiment: Count of population size (3)
nr	chamber	pos	oldnr	oldtray	nrleaves(9.4.)	nymphs16.4.	adults16.4.	winged 16.4.	sum1	nymphs 23.4.	factor	result23.4.	adults 23.4.	winged 23.4.	sum2	nymphs30.4.	adults30.4.	winged30.4.	result30.4.	factor	sum3	sum3_wo_dead	dead	nymphs7.5.	adults7.5.	winged7.5.	result7.5.	factor	sum4	sum4wodead	temp	light
19	2	7	1	1	34	86	20	0	106	550	2	1100	46		1146	893	38	26	893	1	957	957	0	0			0		0	NA	19.5	16
13	2	1	2	1	48	106	24	0	130	1180	2	2360	67	3	2430	32	3	2	32	1	37	NA	1	0			0		0	NA	19.5	16
17	2	5	3	1	18	100	24	0	124	400	4	1600	19		1619	0	0	0	0	1	0	NA	1	0			0		0	NA	19.5	16
9	1	9	4	1	28	111	15	0	126	160	4	640	15		655	1374	72	2	2748	2	2896	2896	0	0			0		0	NA	17.5	16
47	4	11	5	1	38	72	6	0	78	250	4	1000	14		1014	2318	128	14	4636	2	4920	4920	0	0			0		0	NA	19.5	12
6	1	6	6	1	20	95	10	0	105	170	4	680	11		691	334	17	0	334	1	351	351	0	0			0		0	NA	17.5	16
3	1	3	7	1	36	83	6	0	89	60	4	240	8		248	1746	103	7	3492	2	3712	3712	0	0			0		0	NA	17.5	16
37	4	1	8	1	34	77	7	0	84	270	4	1080	11		1091	72	9	0	72	1	81	NA	1	0			0		0	NA	19.5	12
49	4	0	9	1	36	99	8	0	107	260	4	1040	10		1050	1473	96	22	2946	2	3182	3182	0	0			0		0	NA	19.5	12
32	3	8	10	1	20	90	11	0	101	120	4	480	4		484	279	15	2	558	2	592	592	0	0			0		0	NA	17.5	12
28	3	4	11	1	34	65	8	0	73	140	4	560	6	1	567	1454	79	18	2908	2	3102	3102	0	0			0		0	NA	17.5	12
24	2	12	12	1	36	55	9	0	64	160	4	640	9		649	7	0	0	7	1	7	NA	1	0			0		0	NA	19.5	16
30	3	6	13	1	38	82	9	0	91	130	4	520	7		527	1578	86	17	3156	2	3362	3362	0	0			0		0	NA	17.5	12
48	4	12	14	1	42	80	11	0	91	190	4	760	13		773	1790	122	16	3580	2	3856	3856	0	0			0		0	NA	19.5	12
12	1	12	18	2	16	112	13	0	125	110	4	440	7		447	0	0	0	0	1	0	NA	1	0			0		0	NA	17.5	16
34	3	10	19	2	22	122	14	0	136	190	4	760	12		772	1043	52	6	2086	2	2202	2202	0	0			0		0	NA	17.5	12
10	1	10	20	2	30	82	11	0	93	190	4	760	14		774	802	49	0	1604	2	1702	1702	0	0			0		0	NA	17.5	16
42	4	6	22	2	34	28	4	0	32	60	4	240	5		245	412	31	2	824	2	890	890	0	106	14	7	28	2	98	98	19.5	12
31	3	7	24	2	32	111	14	0	125	260	4	1040	11		1051	1419	103	9	2838	2	3062	3062	0	0			0		0	NA	17.5	12
20	2	8	25	2	36	99	13	0	112	180	4	720	8		728	1261	NA	NA	2522	2	2522	2522	0	242	22	16	44	2	164	164	19.5	16
8	1	8	26	2	44	124	12	0	136	170	4	680	9		689	1568	71	0	3136	2	3278	3278	0	678	17	4	17	1	38	38	17.5	16
41	4	5	27	2	34	119	12	0	131	220	4	880	11		891	2	0	0	2	1	2	NA	1	0			0		0	NA	19.5	12
16	2	4	29	2	32	145	27	0	172	490	4	1960	23	3	1986	0	0	0	0	1	0	NA	1	0			0		0	NA	19.5	16
44	4	8	30	2	36	124	15	0	139	310	4	1240	16		1256	701	34	0	1402	2	1470	1470	0	0			0		0	NA	19.5	12
11	1	11	31	3	42	73	9	0	82	110	4	440	6	1	447	1043	106	0	2086	2	2298	2298	0	410	36	9	72	2	234	234	17.5	16
15	2	3	32	3	34	94	11	0	105	140	4	560	7		567	2094	217	16	4188	2	4654	4654	0	0			0		0	NA	19.5	16
46	4	10	34	3	34	98	15	0	113	220	4	880	15		895	82	2	1	82	1	85	NA	1	0			0		0	NA	19.5	12
35	3	11	35	3	40	102	11	0	113	160	4	640	8		648	1769	90	12	3538	2	3742	3742	0	0			0		0	NA	17.5	12
29	3	5	36	3	36	137	15	0	152	220	4	880	12		892	1939	74	6	3878	2	4038	4038	0	0			0		0	NA	17.5	12
27	3	3	37	3	46	72	9	0	81	100	4	400	7		407	1493	115	3	2986	2	3222	3222	0	171	24	5	24	1	53	53	17.5	12
40	4	4	38	3	40	86	12	0	98	230	4	920	11		931	2111	126	14	4222	2	4502	4502	0	0			0		0	NA	19.5	12
14	2	2	39	3	66	82	10	0	92	250	4	1000	16		1016	190	6	1	380	2	394	NA	1	0			0		0	NA	19.5	16
7	1	7	41	3	34	72	6	0	78	130	4	520	6		526	1375	61	0	2750	2	2872	2872	0	0			0		0	NA	17.5	16
2	1	2	42	3	28	133	9	0	142	180	4	720	11		731	2212	108	0	4424	2	4640	4640	0	37	9	10	9	1	28	28	17.5	16
43	4	7	43	3	30	134	12	0	146	180	4	720	13		733	1109	56	7	2218	2	2344	2344	0	0			0		0	NA	19.5	12
22	2	10	45	3	36	154	17	0	171	330	4	1320	17		1337	0	0	0	0	1	0	NA	1	0			0		0	NA	19.5	16
1	1	1	46	4	42	143	12	0	155	210	4	840	11		851	2702	113	29	5404	2	5688	5688	0	43	15	4	30	2	98	98	17.5	16
36	3	12	47	4	38	111	11	0	122	130	4	520	7		527	1505	64	32	3010	2	3202	3202	0	260	44	21	88	2	306	306	17.5	12
39	4	3	48	4	too small			0	0		4	0			0				0	2	0	NA	1	0			0		0	NA	19.5	12
25	3	1	50	4	26	147	14	0	161	140	4	560	4		564	1140	60	14	2280	2	2428	2428	0	0			0		0	NA	17.5	12
33	3	9	52	4	26	117	9	0	126	180	4	720	8		728	760	44	9	1520	2	1626	1626	0	0			0		0	NA	17.5	12
23	2	11	53	4	38	108	11	0	119	270	4	1080	14		1094	2849	103	8	2849	1	2960	2960	0	0			0		0	NA	19.5	16
21	2	9	54	4	12	157	13	0	170	74	1	74	3		77	0	0	0	0	2	0	NA	1	0			0		0	NA	19.5	16
38	4	2	55	4	32	76	4	0	80	230	4	920	17		937	1196	84	26	1196	1	1306	1306	0	0			0		0	NA	19.5	12
26	3	2	56	4	34	147	17	0	164	190	4	760	14		774	22	3	2	44	2	54	NA	1	0			0		0	NA	17.5	12
5	1	5	57	4	30	97	9	0	106	260	4	1040	16		1056	2316	162	27	4632	2	5010	5010	0	0			0		0	NA	17.5	16
18	2	6	58	4	34	143	12	0	155	320	4	1280	19		1299	888	22	7	1776	2	1834	1834	0	0			0		0	NA	19.5	16
45	4	9	59	4	28	123	10	0	133	220	4	880	14		894	389	17	5	778	2	822	822	0	0			0		0	NA	19.5	12
4	1	4	60	4	32	68	6	0	74	240	4	960	17		977	4627	NA	NA	9254	2	9254	9254	0	0			0		0	NA	17.5	16
